# Supplementary material for: Enhanced denitrification of contaminated groundwater by novel bimetallic catalysts supported on kaolin-derived zeolite: effects of natural dissolved inorganic and organic matter
Source: Royal Society of Chemistry journal article supplement (doi:10.1039/d0en00861c), 2020-01-01
Supplement: d0en00861c1.pdf [file d0en00861c1.pdf]

Supplementary data

**Enhanced denitrification of contaminated  
groundwater by novel bimetallic catalyst  
supported by kaolin-derived zeolite: Effects of  
natural dissolved inorganic and organic matter**

**Minhee Choi<sup>1</sup>, Jaehyeong Park<sup>2</sup>, Sunho Yoon<sup>1</sup>, Yun Kyung Lee<sup>3</sup>, Jin Hur<sup>3</sup>, Jong Kwon  
Choe<sup>2</sup>, Taehui Nam<sup>4,5</sup>, Sokhee P. Jung<sup>4,\*†</sup>, Sungjun Bae<sup>1,\*†</sup>**

<sup>1</sup>Department of Civil and Environmental Engineering, Konkuk University, 120 Neungdong-ro, Gwangjin-gu,  
Seoul 05029, Republic of Korea

<sup>2</sup>Department of Civil and Environmental Engineering and Institute of Construction and Environmental  
Engineering, Seoul National University, 1 Gwanak-ro Gwanak-gu Seoul 08826, Republic of Korea

<sup>3</sup>Department of Environment and Energy, Sejong University, 209 Neungdong-ro, Gwangjin-gu, Seoul 05006,  
South Korea

<sup>4</sup>Department of Environment and Energy Engineering, Chonnam National University, Gwangju 61186,  
Republic of Korea

<sup>5</sup>Water Environmental Chemistry Research Division, Yeongsan River Environment Research Center, Gwangju  
61011, Republic of Korea

\*Corresponding author: [bsj1003@konkuk.ac.kr](mailto:bsj1003@konkuk.ac.kr); [sokheejung@chonnam.ac.kr](mailto:sokheejung@chonnam.ac.kr)

phone: +82-02-450-3904, +82-62-530-1859

† Contributed equally to this work

A supplementary data submitted to *Environmental Science-Nano*

## Supplementary data

### Chemicals and Materials

Sodium hydroxide (NaOH, 97.0%, Daejung Chemicals & Metals Co., Ltd., Korea) was used to synthesize zeolites from kaolin (Seoul Chemical Industry, Korea). Precursor solutions of Pd and In were prepared using palladium(II) chloride (99%, Sigma-Aldrich Inc., USA) and indium(III) chloride (98%, Sigma-Aldrich Inc., USA), respectively. The other Pd-In bimetallic catalysts supported by different materials were prepared using silicon dioxide (~99%, 0.5–10  $\mu\text{m}$ , Sigma-Aldrich Inc., USA), aluminum oxide (99.5%,  $\leq 10$   $\mu\text{m}$ , Sigma-Aldrich Inc., USA), and zeolite A-4 (200 mesh, Wako Pure Chemicals Corp., Japan). Pd-In bimetallic catalysts were activated using 10 mM sodium borohydride (98%, Sigma-Aldrich Inc., USA) before the reaction.

Potassium nitrate (99.0%, Duksan Pure Chemical Co., Korea), potassium nitrite (99.0%, Sigma-Aldrich Inc., USA), and ammonium chloride (98.5%, Shinyo Pure Chemicals Co., Japan) were used to prepare the stock solutions of nitrate, nitrite, and ammonia, respectively. Calcium chloride dihydrate (99.0%, Junsei Chemical Co., Ltd., Japan), sodium chloride (99.0%, Samchun Pure Chemicals Co., Korea), and sodium sulfate (99.0%, Showa Chemical Industry Co., Japan) were used for standard solutions for ion chromatography (IC). Sodium bicarbonate (99.0%, Samchun Pure Chemicals Co., Korea), sodium carbonate (99.95%, Sigma-Aldrich Inc., USA), sulfuric acid (60%, Daejung Chemicals & Metals Co., Ltd., Korea), and nitric acid/dipicolinic acid (Sigma-Aldrich Inc., USA) were used to prepare eluents for IC operation.

### Characterization of ZK70 and Pd-In/ZK70

The specific surface areas of ZK70 and Pd-In/ZK70 were measured by nitrogen adsorption and desorption at  $-196$   $^{\circ}\text{C}$  with a Brunauer–Emmett–Teller surface analyzer (Tristar II, Micrometrics, USA). X-ray diffraction (XRD) analysis was performed to identify the mineral

## Supplementary data

phase using an automated diffractometer with Cu-K $\alpha$  radiation (DE/D8 advance, Bruker, Germany). The samples were scanned with  $2\theta$  in the range  $10^\circ$ – $50^\circ$  with a scan speed of  $1^\circ \text{ min}^{-1}$ .

The samples for surface characterization of Pd-In/ZK70 after reduction of  $\text{NO}_3^-_{\text{GW}}$  (reaction time = 180 min) were prepared as follows: after finishing the reaction, stirring and  $\text{H}_2$  and  $\text{CO}_2$  supplies were stopped and Ar purging was started to prevent a possible oxidation of the catalyst by air. The solution was then sealed and transferred to the anaerobic chamber to minimize the surface oxidation of the catalyst. The used Pd-In/ZK70 catalyst was vacuum-filtered using a mixed cellulose ester membrane filter ( $0.2 \mu\text{m}$ , Advantech, Japan). The collected catalyst was rinsed with DDIW, 50% deaerated ethanol, and 100% deaerated ethanol sequentially. All washed samples were dispersed in deaerated ethanol to prevent further oxidation before the analyses.

The morphological characteristics of kaolin, ZK70, and Pd-In/ZK70 were investigated using field emission scanning electron microscopy (FE-SEM) (SU8010, Hitachi, Japan), field-emission transmission electron microscopy (FE-TEM) (JEM-F200, JEOL Ltd, Japan), and Cs-TEM (JEM-ARM200F, JEOL Ltd, Japan) equipped with energy-dispersive X-ray spectroscopy (EDX). The elemental dispersion of Pd, In, Si, Al, and O on the surface of ZK70 and Pd-In/Zk70 was identified by FE-TEM/EDX. The suspensions of ZK70, fresh Pd-In/ZK70, and used Pd-In/ZK70 were diluted with deaerated ethanol and sonicated for 10 min to completely disperse the particles. The droplets of the diluted samples were put on a 200 mesh copper TEM grid and dried in the anaerobic chamber. Samples were analyzed by FE-TEM at 200 kV.

The oxidation states of Pd and In on the surface of 1.25% Pd-0.25% In/ZK70 before activation, after activation with  $\text{NaBH}_4$ , and after reduction of  $\text{NO}_3^-$  in groundwater were investigated by XPS (K-Alpha, Thermo Scientific, USA) with Al  $K\alpha$  X-ray (1486.7 eV)

## Supplementary data

radiation at a source power of 75 W. The C 1s peak at 285 eV was used as a reference. The narrow-scan spectra in the ranges 460–439 and 350–330 eV were obtained to identify the oxidation states of In and Pd species on the Pd-In/ZK70 surface, respectively.

ZK70, 1.25% Pd/ZK70, 0.25% In/ZK70, and 1.25% Pd-0.25% In/ZK70 were introduced into a conventional flow system for the TPR analysis (AutoChemII2920, Micromeritics Instrument Corp., USA) and examined in the temperature range of 50–1000 °C with ramping of 20°C /min. A stream of 10% H<sub>2</sub>/Ar was passed through the system bed at a flow rate of 10 cm<sup>3</sup>/min.

The cumulative H<sub>2</sub> uptake, metal dispersion, metallic surface area, active particle diameter, cubic crystallite size, and active metal sites of 1.25% Pd/ZK70 and 1.25% Pd-0.25% In/ZK70 were obtained by H<sub>2</sub> pulse chemisorption using an AutoChemII2920 (Micromeritics Instrument Corp., USA). X% Pd/ZK70 and X% Pd-X% In/ZK70 were outgassed under vacuum, followed by reduction under the flow of 10% H<sub>2</sub>/Ar for 2 h at 350 °C, followed by flushing with Ar for 1 h and cooling to 30 °C. The pulse chemisorption test was conducted at 30 °C by pulsing the 10% H<sub>2</sub>/Ar.

## Supplementary data

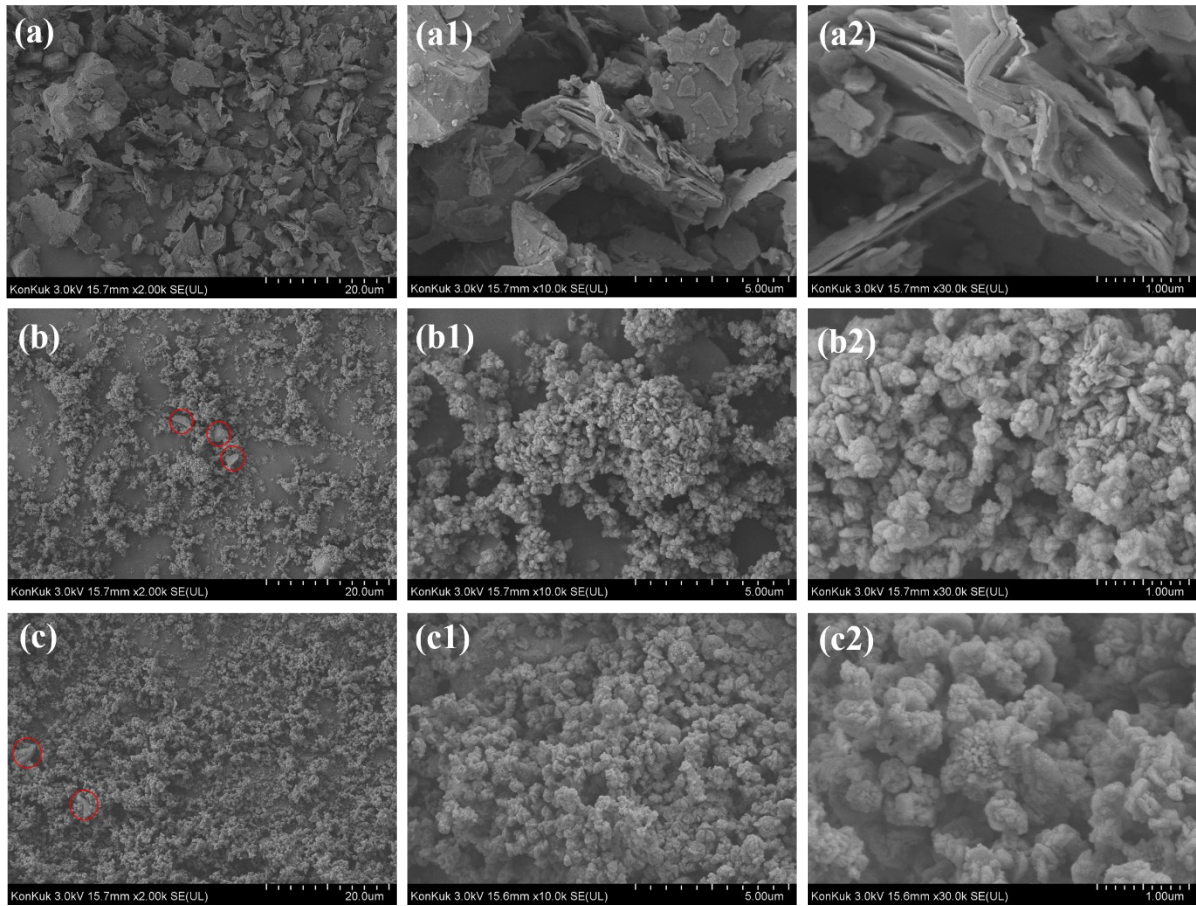

**Figure S1.** FE-SEM images of (a, a1, and a2) kaolin, (b, b1, and b2) ZK70, and (c, c1, and c2) 1.25 wt% Pd-0.25 wt% In/ZK70.

## Supplementary data

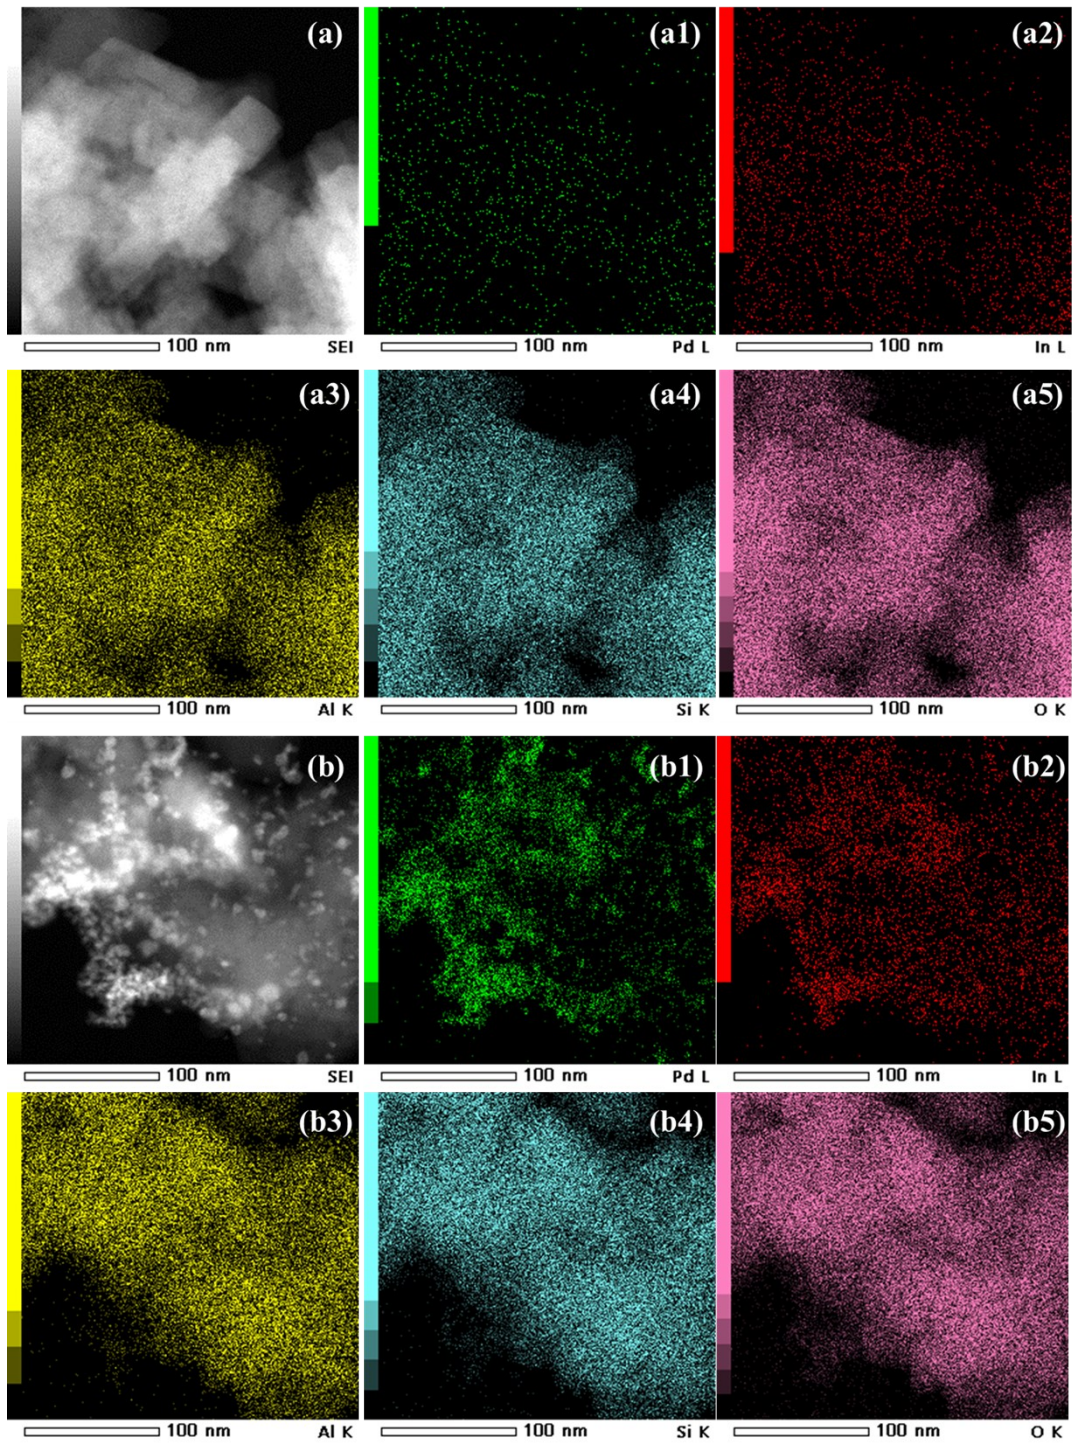

**Figure S2.** FE-TEM/EDS results of (a) ZK70 and (b) 1.25 wt% Pd-0.25 w.% In/ZK70 after activation; EDS electron mapping of (a1 and b1) Pd, (a2 and b2) In, (a3 and b3) Al, (a4 and b4) Si, and (a5 and b5) O.

## Supplementary data

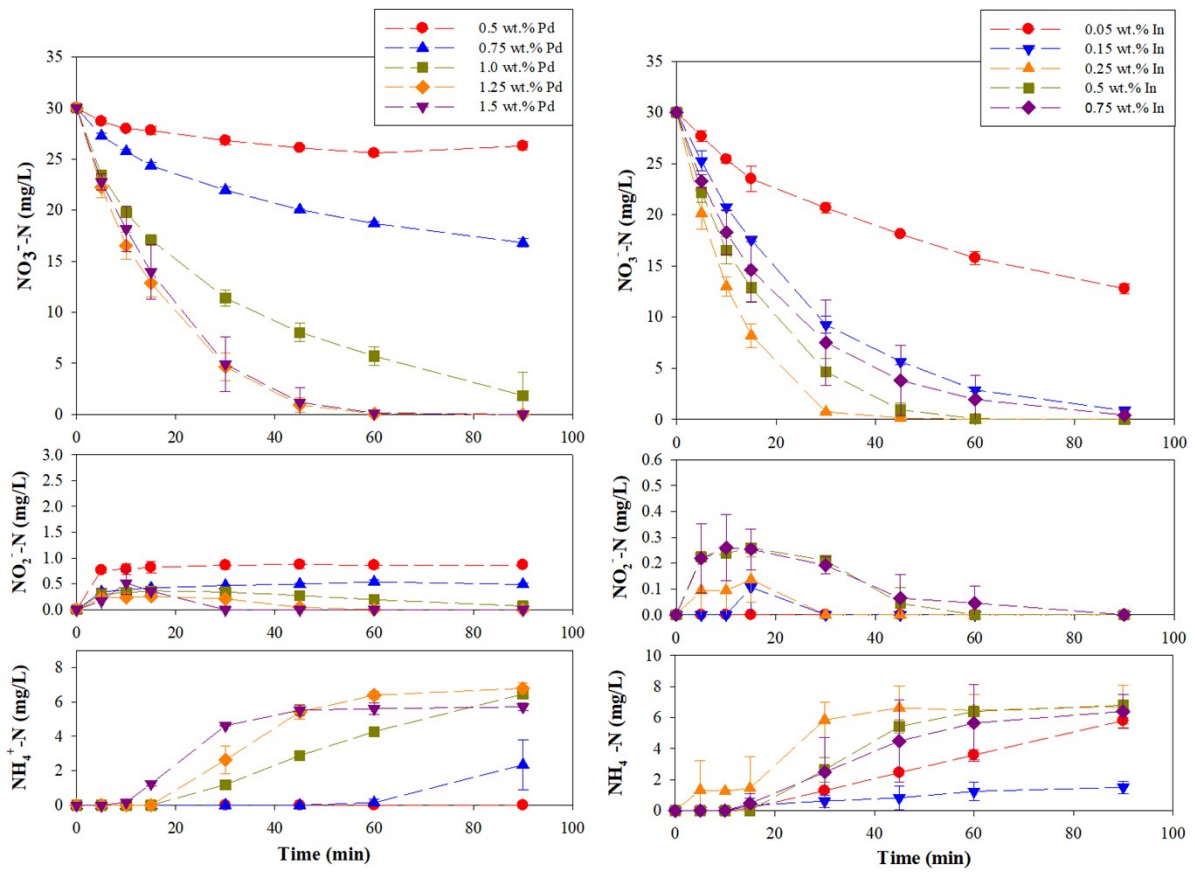

**Figure S3.** (a) The effect of Pd loading on  $\text{NO}_3^-$  reduction by X wt.% Pd-0.5 wt% In/ZK70 (X= 0.5, 0.75, 1.0, 1.25, 1.5). (b) The effect of In loading on  $\text{NO}_3^-$  reduction by 1.25 wt% Pd-X wt% In/ZK70 (X = 0.05, 0.15, 0.25, 0.5, 0.75).

## Supplementary data

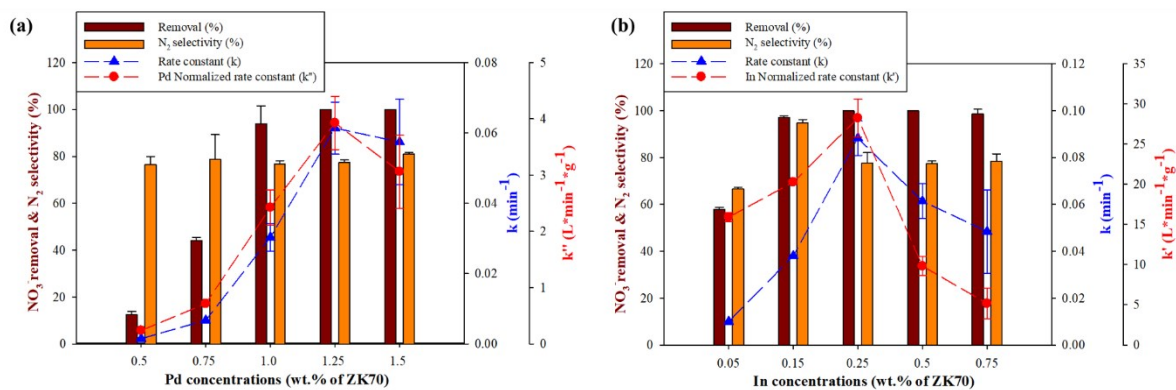

**Figure S4.** (a) NO<sub>3</sub><sup>-</sup><sub>aq</sub> removal, N<sub>2</sub> selectivity, rate constant ( $k$ ), and Pd normalized rate constant ( $k'$ ) of X wt% Pd-0.5 wt% In/ZK70 (X= 0.5, 0.75, 1.0, 1.25, 1.5). (b) NO<sub>3</sub><sup>-</sup><sub>aq</sub> removal, N<sub>2</sub> selectivity, rate constant ( $k$ ), and In normalized rate constant ( $k'$ ) of 1.25 wt% Pd-X wt% In/ZK70 (X = 0.05, 0.15, 0.25, 0.5, 0.75).



## Supplementary data

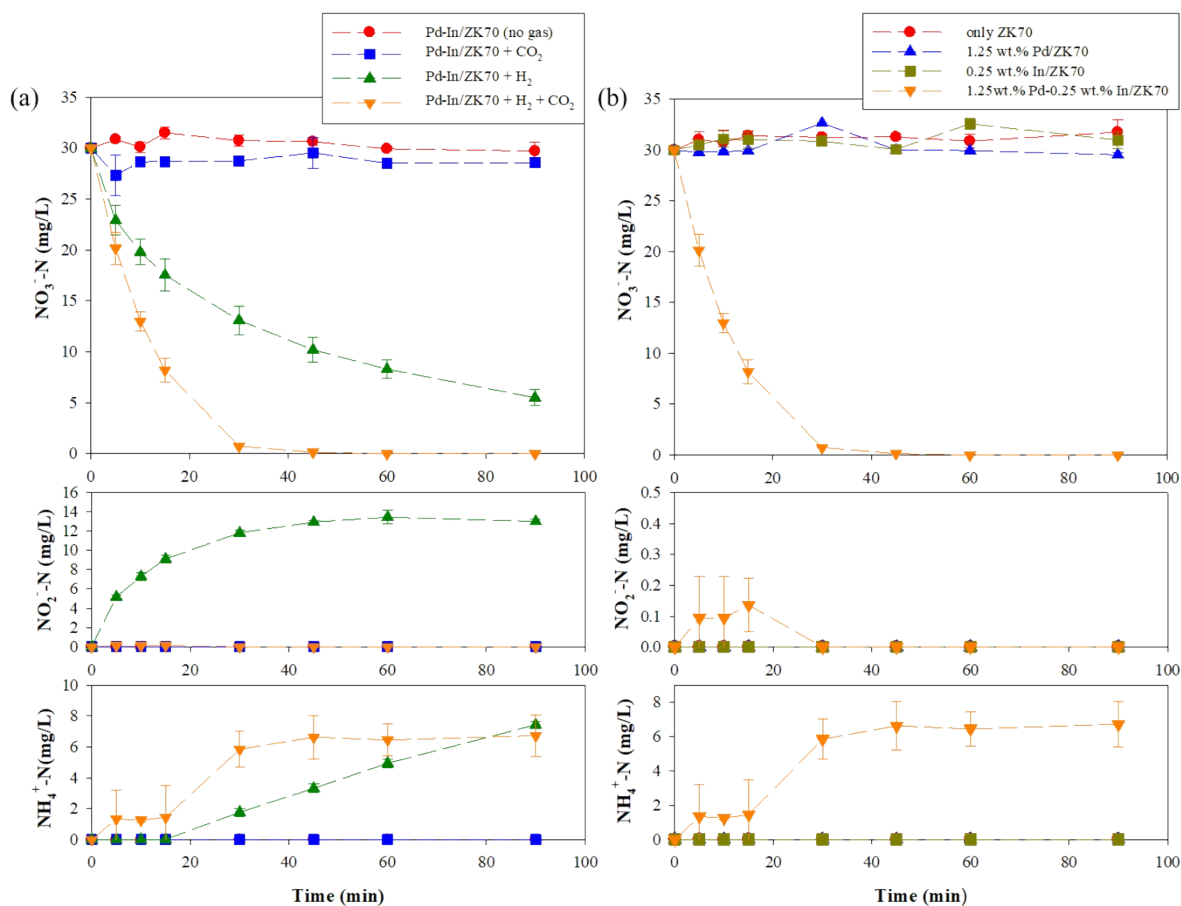

**Figure S5.** (a) The concentrations of  $\text{NO}_3^-_{\text{aq}}$ ,  $\text{NO}_2^-$ , and  $\text{NH}_4^+$  as a function of reaction time during the catalytic reduction of  $\text{NO}_3^-_{\text{aq}}$  by Pd-In/ZK70 (1.25 g/L, Pd = 1.25 wt%, In = 0.25 wt%) catalysts with only  $\text{H}_2$ , only  $\text{CO}_2$ , and both  $\text{H}_2$  and  $\text{CO}_2$ , and without both  $\text{H}_2$  and  $\text{CO}_2$ ;  $\text{H}_2$  flow rate = 45  $\text{cm}^3/\text{min}$ ,  $\text{CO}_2$  flow rate = 40  $\text{cm}^3/\text{min}$ . Reaction time was 90 min. (b) The concentrations of  $\text{NO}_3^-_{\text{aq}}$ ,  $\text{NO}_2^-$ , and  $\text{NH}_4^+$  as a function of reaction time during the catalytic reduction of  $\text{NO}_3^-$  on only ZK70, Pd/ZK70 (Pd = 1.25 wt%), In/ZK70 (In = 0.25 wt%) and Pd-In/ZK70 (Pd = 1.25 wt%, In = 0.25 wt%). Catalyst loading: 1.25 g/L.

## Supplementary data

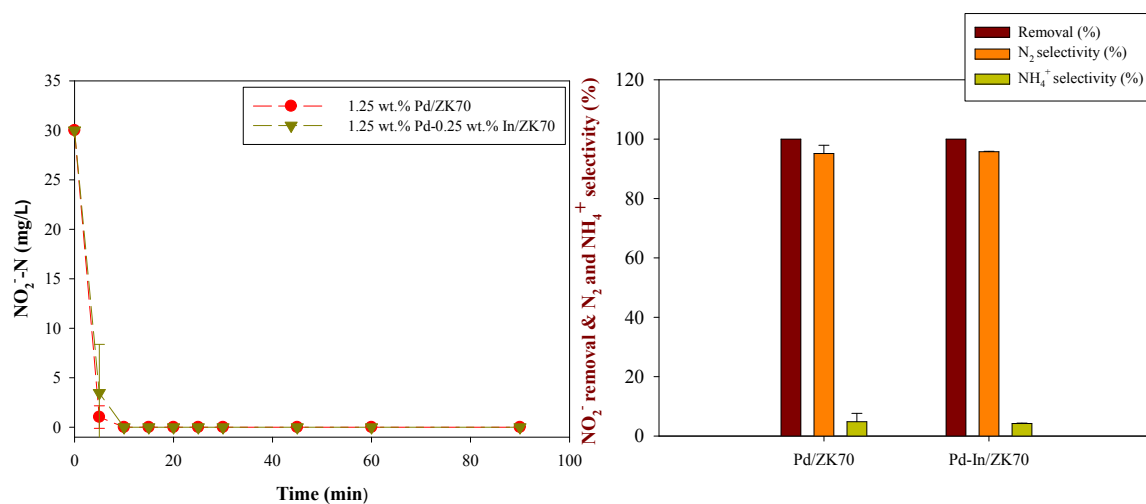

**Figure S6.** (a) The removal kinetics of  $\text{NO}_2^-$  by 1.25 wt% Pd/ZK70 and 1.25 wt% Pd-0.25 wt% In/ZK70, (b)  $\text{NO}_2^-$  removal and byproduct selectivity of 1.25 wt% Pd/ZK70 and 1.25 wt% Pd-0.25 wt% In/ZK70.

## Supplementary data

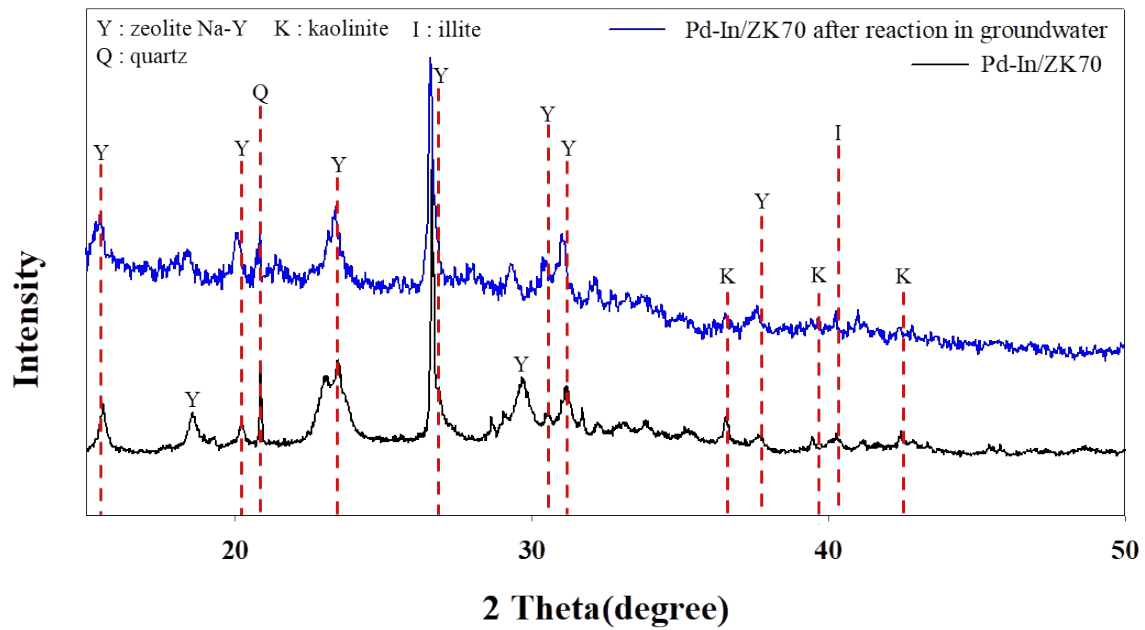

**Figure S7.** XRD spectra of Pd-In/ZK70 before reaction, and after reaction in groundwater (Pd = 1.25 wt%, In = 0.25 wt%).

## Supplementary data

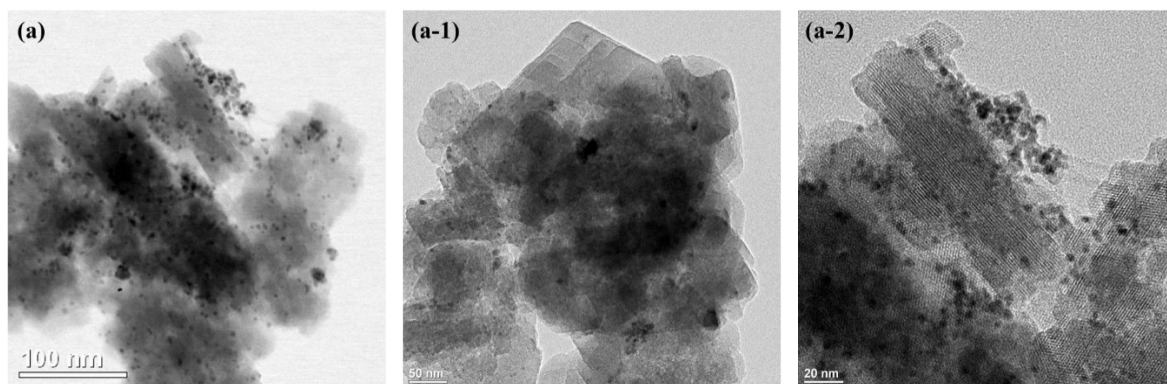

**Figure S8.** TEM images of Pd-In/ZK70 after reaction in real groundwater (Pd = 1.25 wt%, In = 0.25 wt%).

## Supplementary data

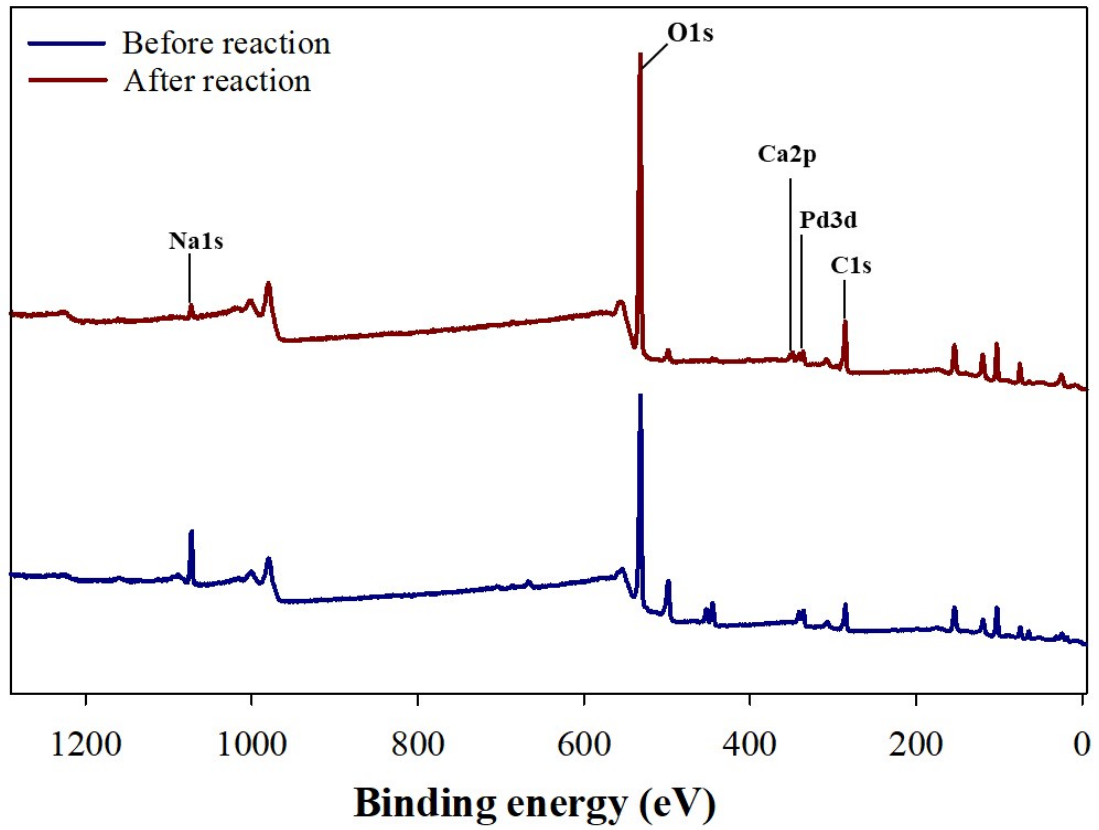

**Figure S9.** Survey scan of XPS for the sample of 1.25 wt% Pd-0.25 wt% In/ZK70 before and after reaction of  $\text{NO}_3^-_{\text{GW}}$  reduction.

## Supplementary data

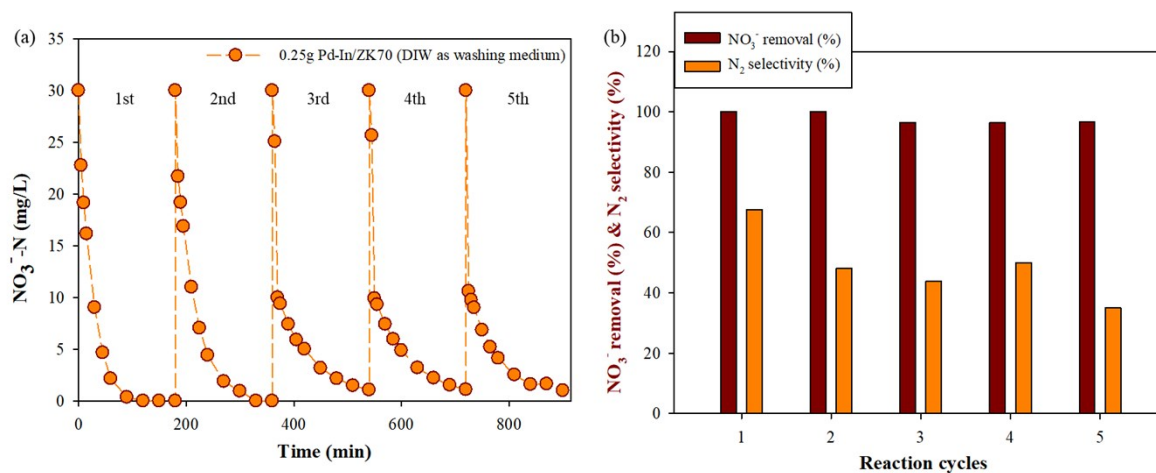

**Figure S10.** (a) Kinetics of  $\text{NO}_3^-$  reduction by 0.25g of 1.25 wt% Pd- 0.25 wt% In/ZK70 during five recycling test in groundwater without regeneration and reactivation process. (b)  $\text{N}_2$  selectivity and  $\text{NO}_3^-$  removal by 0.25g of 1.25 wt.% Pd- 0.25 wt.% In/ZK70 on repeated five recycling test.
